# Supplementary material for: A Missense Variant in TP53 Could Be a Genetic Biomarker Associated with Bone Tissue Alterations
Source: MDPI journal article supplement (doi:10.3390/ijms25031395), 2024-01-23
Supplement: s1 [file s1]

**A Missense Variant in TP53 Could Be a Genetic Biomarker Associated to Bone Tissue Alterations**

**Supplementary Materials**

**Supplementary Table S1.** Bone morphometry parameters in 72Arg-p53 and 72Pro-p53 mice.

| Bone morphometry parameters (mean (SD)) | Femur          |                 |         | Tibia          |                |         |
|-----------------------------------------|----------------|-----------------|---------|----------------|----------------|---------|
|                                         | 72Arg-p53      | 72Pro-p53       | p-value | 72Arg-p53      | 72Pro-p53      | p-value |
| Cortical Thickness                      | 0.5477 (0.039) | 0.5561 (0.0481) | 0.808   | 0.4593 (0.041) | 0.4329 (0.034) | 0.730   |
| Trabecular percent bone volume (BV/TV)  | 15.1 (1.6)     | 11.9 (0.7)      | 0.040   | 16.4 (0.8)     | 13.1 (1.1)     | 0.013   |
| Trabecular number (Tb.N)                | 11.2 (2.3)     | 9.1 (0.6)       | 0.022   | 8.2 (0.6)      | 5.9 (0.4)      | 0.009   |
| Trabecular separation (Tb.S)            | 0.12 (0.005)   | 0.15 (0.009)    | 0.006   | 0.10 (0.018)   | 0.14 (0.020)   | 0.041   |
| Trabecular thickness (Tb.Th)            | 0.029 (0.004)  | 0.027 (0.001)   | 0.449   | 0.027 (0.002)  | 0.017 (0.003)  | 0.015   |

**Supplementary Table S2.** Scan parameters.

| Variable        | Standard Unit | Value  |
|-----------------|---------------|--------|
| Voxel size      | μm3           | 300.76 |
| Source Voltage  | kV            | 50     |
| Source Current  | μA            | 100    |
| Exposure time   | ms            | 4920   |
| Frame averaging | N             | 5      |
| Projections     | N             | 130    |

**Supplementary Table S3.** Gene-specific primer sequences for real-time quantitative PCR.

| <b>Gene</b>                       | <b>Primer sequence ( 5' to 3')</b> |
|-----------------------------------|------------------------------------|
| <i>OPG-Fwd</i>                    | TACCTGGAGATCGAATTCTGCTT            |
| <i>OPG-Rev</i>                    | CCATCTGGACATTTTTTGCAA              |
| <i>RANKL-Fwd</i>                  | CCTGAGGCCAGCCATT                   |
| <i>RANKL-Rev</i>                  | CTTGGCCCAGCCTCGAT                  |
| <i>BCL2-Fwd</i>                   | TTCAGGGATGGGGTGAAGT                |
| <i>BCL2-Rev</i>                   | CACAGGGCGATGTTGT                   |
| <i>BAX-Fwd</i>                    | CCCGAGAGGTCTTCTTCC                 |
| <i>BAX-Rev</i>                    | GCCTTGAGCACCAGTTTG                 |
| <i>CASP3-Fwd</i>                  | GTGGACTCTGGGATCTATCT               |
| <i>CASP3-Rev</i>                  | CCATGAATGTCTCTCTGAGG               |
| <i>CASP8-Fwd</i>                  | CGGAAGACATAACCCAACT                |
| <i>CASP8-Rev</i>                  | GTGGGATAGGATACAGCAGA               |
| <i>CASP9-Fwd</i>                  | AGTTCCCGGGTGCTGTCTAT               |
| <i>CASP9-Rev</i>                  | GCCATGGTCTTTCTGCTCAC               |
| <i>IL1-Fwd</i>                    | ACAAACCACCCGTTTCACCT               |
| <i>IL1-Rev</i>                    | ATGGGTGGAGGGTTCACCT                |
| <i>IL6-Fwd</i>                    | GAGGATACCACTCCCAACAGACC            |
| <i>IL6-Rev</i>                    | AAGTGCATCATCGTTGTTTCATACA          |
| <i>IL10-Fwd</i>                   | GCTCTTACTGACTGGCATGAG              |
| <i>IL10-Rev</i>                   | CGCAGCTCTAGGAGCATGTG               |
| <i>TNF<math>\alpha</math>-Fwd</i> | ACCCTCACACTCAGATCATCTTC            |
| <i>TNF<math>\alpha</math>-Rev</i> | TGGTGGTTTGCTACGACGT                |
| <i>COX2-Fwd</i>                   | AACCGAGTCGTTCTGCCAAT               |
| <i>COX2-Rev</i>                   | GGGACTGCTCATGAGTGGAG               |
| <i>CYBB-Fwd</i>                   | GACCTCCCAGAGAACACAGC               |
| <i>CYBB-Rev</i>                   | ACCCTAGCCTGCTTATGGGA               |
| <i>GPX6-Fwd</i>                   | GTCACGGTTTTGGGCTTTCC               |
| <i>GPX6-Rev</i>                   | CCCCCTTCTCAAAGAGCTGG               |
| <i>SOD1-Fwd</i>                   | GGAACCATCCACTTCGAGCA               |
| <i>SOD1-Rev</i>                   | CCCATGCTGGCCTTCAGTTA               |
| <i>TXN2-Fwd</i>                   | CTGTAGCCTGACCGCACTAG               |
| <i>TXN2-Rev</i>                   | AGGCAGGAGAGGAAATGTGC               |
| <i>TXNRD1-Fwd</i>                 | CTCGGAGGAACGTGTGTGAA               |
| <i>TXNRD1-Rev</i>                 | AGTTGCGCGAGTCTTTCAGA               |
| <i>GAPDH-Fwd</i>                  | TGCACCACCAACTGCTTAGC               |
| <i>GAPDH-Rev</i>                  | CACCACCTTCTTGATGTCATCA             |

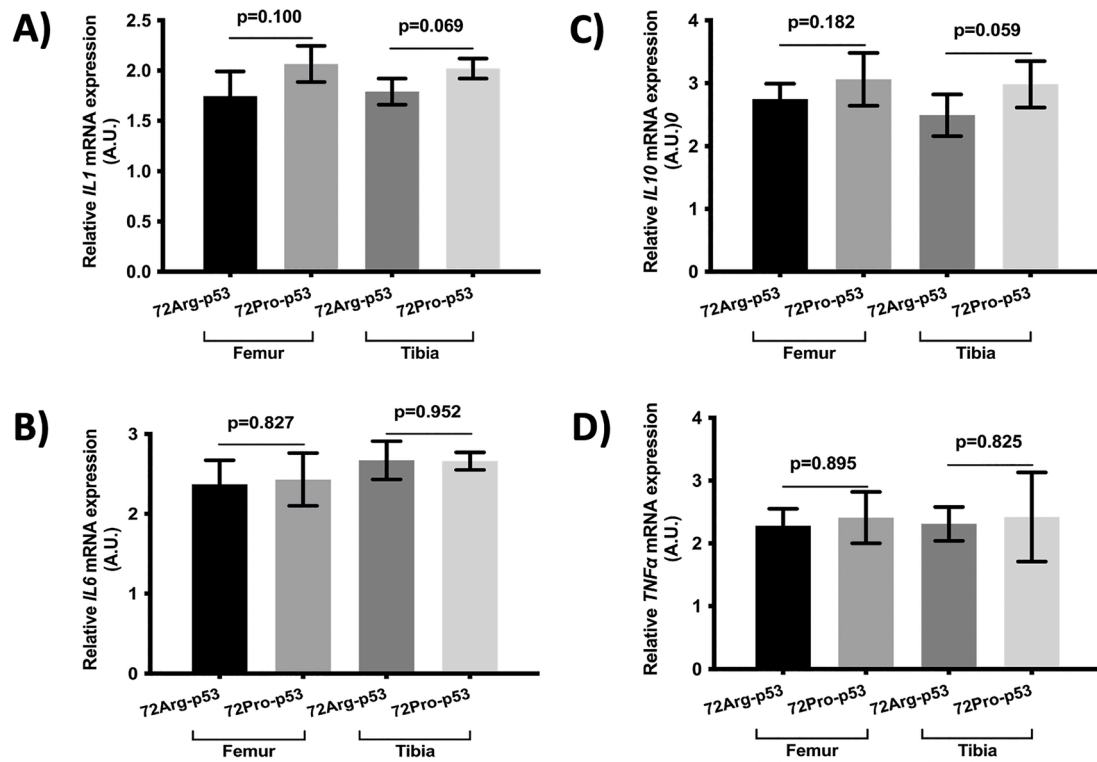

**Supplementary Figure S1.** Relative mRNA expressions of inflammation-related genes in femur and tibia bone tissue. Relative mRNA expressions of IL1 gene (A), IL6 gene (B), IL10 gene (C), and TNFα gene (D). Bars represent mean values and their respective standard deviation. A.U.: arbitrary units

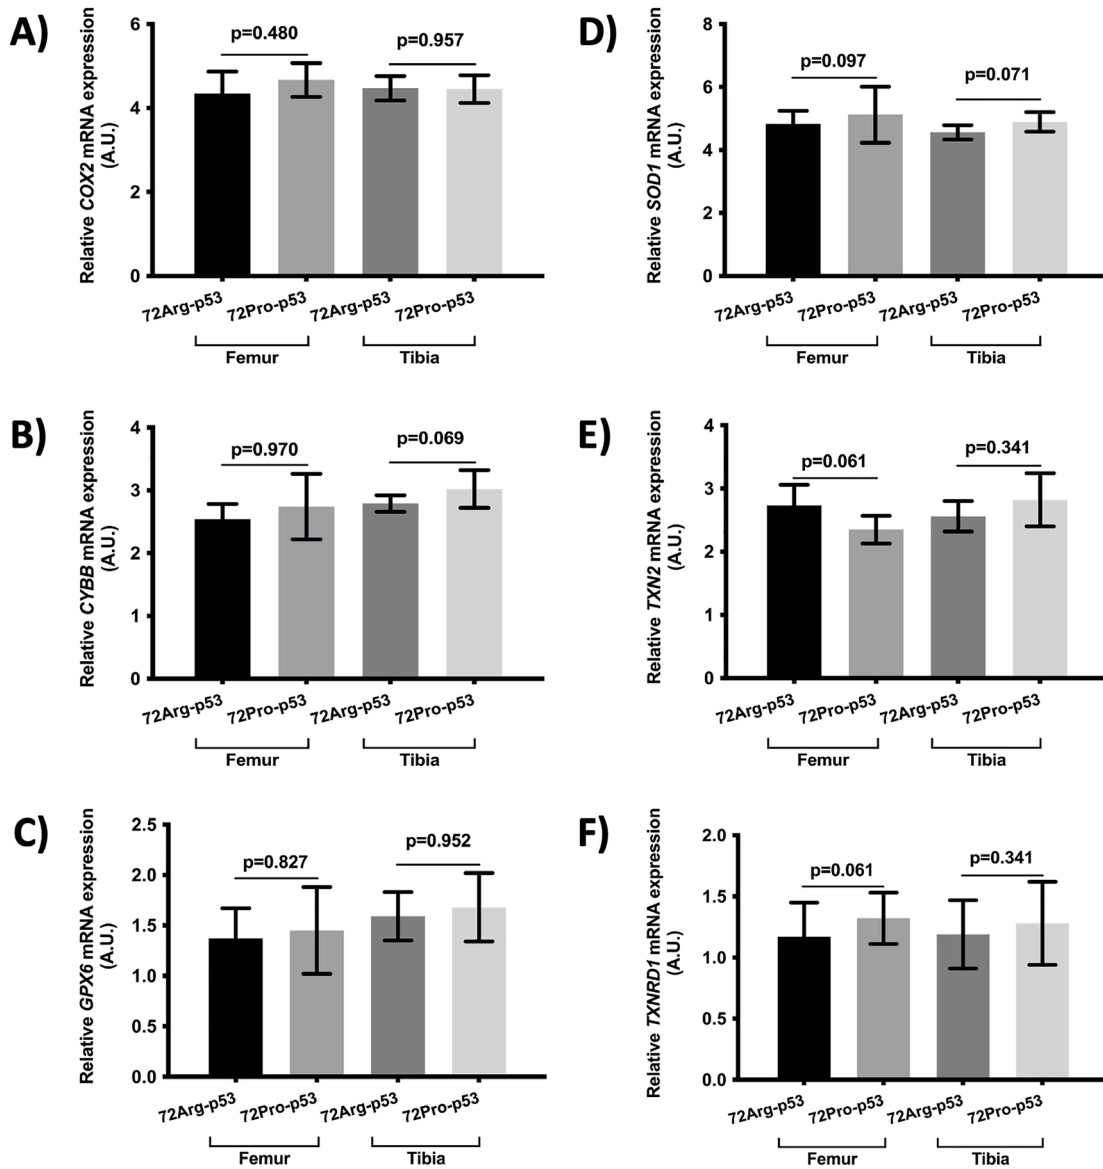

**Supplementary Figure S2.** Relative mRNA expressions of oxidative stress-related genes in femur and tibia bone tissue. Relative mRNA expressions of COX2 gene (A), CYBB gene (B), GPX6 gene (C), SOD1 gene (D), TXN2 gene (E), and TXNRD1 gene (F). Bars represent mean values and their respective standard deviation. A.U.: arbitrary units.
